# Supplementary material for: Solving Large-Scale Fixed-Budget Ranking and Selection Problems
Source: Atypon-hosted journal article supplement (doi:10.1287/ijoc.2022.1221), 2022-07-28
Supplement: ijoc.2022.1221.sm1.pdf [file ijoc.2022.1221.sm1.pdf]

# Online Supplement of the Paper “Solving Large-Scale Fixed-Budget Ranking and Selection Problems”

L. Jeff Hong

School of Management and School of Data Science, Fudan University, Shanghai, 200433 China, hong\_liu@fudan.edu.cn

Guangxin Jiang

School of Management, Harbin Institute of Technology, Harbin, 150001 China, gxjiang@hit.edu.cn

Ying Zhong\*

School of Management and Economics, University of Electronic Science and Technology of China, Chengdu, 611731 China, yzhong4@uestc.edu.cn

---

## Appendix A: Proof of Lemmas

### A.1. Proof of Lemma 2

If  $F = \prod_{r=1}^{\infty} (1 - \exp(-\varrho r))$  for some constant  $\varrho > 0$ , then we have

$$\log F = \sum_{r=1}^{\infty} \log(1 - \exp(-\varrho r)). \quad (1)$$

Because the Taylor series for function  $\log(1 - x)$  is  $-x - x^2/2 - x^3/3 - \dots$ , we can rewrite Equation (1) as,

$$\begin{aligned} (1) &= - \sum_{r=1}^{\infty} \sum_{\gamma=1}^{\infty} \frac{\exp(-\varrho \gamma r)}{\gamma} \\ &= - \sum_{\gamma=1}^{\infty} \sum_{r=1}^{\infty} \frac{\exp(-\varrho \gamma r)}{\gamma} \\ &= - \sum_{\gamma=1}^{\infty} \frac{1}{\gamma} \frac{\exp(-\varrho \gamma)}{1 - \exp(-\varrho \gamma)} \\ &\geq - \sum_{\gamma=1}^{\infty} \frac{1}{\gamma} \frac{1}{\varrho \gamma} = - \frac{1}{\varrho} \sum_{\gamma=1}^{\infty} \frac{1}{\gamma^2} = - \frac{\pi^2}{6\varrho}, \end{aligned}$$

where the inequality holds because  $\exp(-\varrho \gamma) / (1 - \exp(-\varrho \gamma)) \leq 1 / (\varrho \gamma)$  for any  $\varrho \gamma > 0$ . It concludes the proof.  $\square$

\* Corresponding Author

## A.2. Proof of Lemma 3

By the Chernoff bound, for any positive constant  $\kappa > 0$ , we have

$$\mathbb{P}(Z \geq d) \leq \frac{\mathbb{E}[\exp(\kappa Z)]}{\exp(\kappa d)} = \exp\left(-\frac{1}{2}\kappa^2 - \kappa d\right). \quad (2)$$

Letting  $\kappa = d$ , Equation (2) yields,

$$\mathbb{P}(Z \geq d) \leq \exp\left(-\frac{d^2}{2}\right). \quad \square$$

## Appendix B: Proof of Propositions

### B.1. Proof of Proposition 1

We prove Proposition 1 in a similar way to that of Theorem 2. We show that if the sample allocation rule  $N_r = \left\lfloor \frac{r}{\phi(\phi-1)} \left(\frac{\phi-1}{\phi}\right)^r N \right\rfloor$  is used and  $\phi \geq 3$ , for any positive constant  $\eta'_1 \geq 2\phi^2$  and IZ parameter  $\delta > 0$ , the PGS of the  $\mathcal{FBKT}$  procedure is lower bounded for all  $k \geq 2$ . We first let  $\hat{k} = 2^{\lceil \log_2 k \rceil}$ . Notice that the procedure can select the best alternative in  $\log_2 \hat{k}$  rounds. For  $1 \leq r \leq \log_2 \hat{k}$ , we let  $\zeta_r$  denote the index of the alternative with the largest mean among the alternatives that are still in contention at the beginning of round  $r$ , i.e.,  $\mu_{\zeta_r} = \max_{i \in \mathcal{I}_r} \mu_i$ , and  $\zeta'_r$  denote the index of the alternative that competes with alternative  $\zeta_r$  in round  $r$ . To ease the notation, we set  $\zeta_r = \varphi$  for  $r = \log_2 \hat{k} + 1$ , where  $\varphi$  is the index of the alternative which is finally selected by the procedure. We also let,

$$\delta_r = \frac{\sqrt{2(\phi-1)} - \sqrt{\phi}}{\sqrt{\phi}} \left(\frac{\phi}{2(\phi-1)}\right)^{\frac{r}{2}} \delta,$$

for  $r \geq 1$ . It can be verified that if  $\phi \geq 3$ ,  $\delta_r > 0$  for  $r \geq 1$  and  $\sum_{r=1}^{\infty} \delta_r = \delta$ . For  $1 \leq r \leq \log_2 \hat{k}$ , we let  $\mathcal{Q}'_r = \{\mu_{\zeta_r} - \mu_{\zeta'_r} \leq \delta_r\} \cup \{\mu_{\zeta_r} - \mu_{\zeta'_r} > \delta_r \text{ and } \bar{X}_{\zeta_r}^r \geq \bar{X}_{\zeta'_r}^r\}$ , and  $\mathcal{Q}'_r{}^c$  denote the complement of event  $\mathcal{Q}'_r$ , i.e.,  $\mathcal{Q}'_r{}^c = \{\mu_{\zeta_r} - \mu_{\zeta'_r} > \delta_r \text{ and } \bar{X}_{\zeta_r}^r < \bar{X}_{\zeta'_r}^r\}$ . Then, we can bound the PGS of the  $\mathcal{FBKT}$  procedure as follows,

$$\begin{aligned} \text{PGS} &\geq \mathbb{P}\left(\bigcap_{r=1}^{\log_2 \hat{k}} \{\mu_{\zeta_r} - \mu_{\zeta_{r+1}} \leq \delta_r\}\right) \\ &\geq \mathbb{P}\left(\bigcap_{r=1}^{\log_2 \hat{k}} \{\mathcal{Q}'_r\}\right) \\ &= \mathbb{P}(\mathcal{Q}'_1) \prod_{r=2}^{\log_2 \hat{k}} \mathbb{P}(\mathcal{Q}'_r | \mathcal{Q}'_1, \dots, \mathcal{Q}'_{r-1}) \\ &= \left(1 - \mathbb{P}(\mathcal{Q}'_1{}^c)\right) \prod_{r=2}^{\log_2 \hat{k}} \left(1 - \mathbb{P}(\mathcal{Q}'_r{}^c | \mathcal{Q}'_1, \dots, \mathcal{Q}'_{r-1})\right), \end{aligned} \quad (3)$$

where the first inequality holds because if the mean difference between alternatives  $\zeta_r$  and  $\zeta_{r+1}$  is less than  $\delta_r$  for  $1 \leq r \leq \log_2 \hat{k}$ , the mean difference between alternative  $\varphi$  and alternative  $k$  is less

than  $\sum_{r=1}^{\infty} \delta_r = \delta$ , and the second inequality holds because event  $\mathcal{Q}'_r$  implies event  $\{\mu_{\zeta_r} - \mu_{\zeta_{r+1}} \leq \delta_r\}$ . Notice that based on the analysis used in Equation (9) in the proof of Theorem 2, we can conclude that,

$$\mathcal{N}_r \geq r \left\lfloor \frac{\eta'_1}{4\phi(\phi-1)} \left( \frac{2(\phi-1)}{\phi} \right)^r \right\rfloor.$$

Then, we can rewrite Equation (3) as follows,

$$\begin{aligned} (3) &= \left( 1 - \mathbb{P} \left( \mu_{\zeta_1} - \mu_{\zeta'_1} > \delta_1 \text{ and } \bar{X}_{\zeta_1}^1 < \bar{X}_{\zeta'_1}^1 \right) \right) \times \\ &\quad \prod_{r=2}^{\log_2 \hat{k}} \left( 1 - \mathbb{P} \left( \mu_{\zeta_r} - \mu_{\zeta'_r} > \delta_r \text{ and } \bar{X}_{\zeta_r}^r < \bar{X}_{\zeta'_r}^r \mid \mathcal{Q}'_1, \dots, \mathcal{Q}'_{r-1} \right) \right) \\ &= \left( 1 - \mathbb{P} \left( \mu_{\zeta_1} - \mu_{\zeta'_1} > \delta_1 \text{ and } \frac{-\bar{X}_{\zeta_1}^1 + \bar{X}_{\zeta'_1}^1 + \mu_{\zeta_1} - \mu_{\zeta'_1}}{\sigma_{\zeta_1 \zeta'_1} / \sqrt{\mathcal{N}_1}} > \sqrt{\mathcal{N}_1} \frac{\mu_{\zeta_1} - \mu_{\zeta'_1}}{\sigma_{\zeta_1 \zeta'_1}} \right) \right) \times \\ &\quad \prod_{r=2}^{\log_2 \hat{k}} \left( 1 - \mathbb{P} \left( \mu_{\zeta_r} - \mu_{\zeta'_r} > \delta_r \text{ and } \frac{-\bar{X}_{\zeta_r}^r + \bar{X}_{\zeta'_r}^r + \mu_{\zeta_r} - \mu_{\zeta'_r}}{\sigma_{\zeta_r \zeta'_r} / \sqrt{\mathcal{N}_r}} > \sqrt{\mathcal{N}_r} \frac{\mu_{\zeta_r} - \mu_{\zeta'_r}}{\sigma_{\zeta_r \zeta'_r}} \mid \mathcal{Q}'_1, \dots, \mathcal{Q}'_{r-1} \right) \right) \\ &\geq \left( 1 - \mathbb{P} \left( \mu_{\zeta_1} - \mu_{\zeta'_1} > \delta_1 \text{ and } Z \geq \sqrt{\left\lfloor \frac{\eta'_1}{2\phi^2} \right\rfloor} \frac{\delta_1}{\sigma_{upper}} \right) \right) \times \\ &\quad \prod_{r=2}^{\log_2 \hat{k}} \left( 1 - \mathbb{P} \left( \mu_{\zeta_r} - \mu_{\zeta'_r} > \delta_r \text{ and } Z > \sqrt{r \left\lfloor \frac{\eta'_1}{4\phi(\phi-1)} \left( \frac{2(\phi-1)}{\phi} \right)^r \right\rfloor} \frac{\delta_r}{\sigma_{upper}} \mid \mathcal{Q}'_1, \dots, \mathcal{Q}'_{r-1} \right) \right) \\ &\geq \left( 1 - \mathbb{P} \left( Z \geq \sqrt{\left\lfloor \frac{\eta'_1}{2\phi^2} \right\rfloor} \frac{\delta_1}{\sigma_{upper}} \right) \right) \times \\ &\quad \prod_{r=2}^{\log_2 \hat{k}} \left( 1 - \mathbb{P} \left( Z > \sqrt{r \left\lfloor \frac{\eta'_1}{4\phi(\phi-1)} \left( \frac{2(\phi-1)}{\phi} \right)^r \right\rfloor} \frac{\delta_r}{\sigma_{upper}} \mid \mathcal{Q}'_1, \dots, \mathcal{Q}'_{r-1} \right) \right) \\ &= \prod_{r=1}^{\log_2 \hat{k}} \left( 1 - \mathbb{P} \left( Z > \sqrt{r \left\lfloor \frac{\eta'_1}{4\phi(\phi-1)} \left( \frac{2(\phi-1)}{\phi} \right)^r \right\rfloor} \frac{\delta_r}{\sigma_{upper}} \right) \right), \end{aligned} \quad (4)$$

where the last equality holds because event  $\{Z > \sqrt{r \lfloor \eta'_1 (2(\phi-1)/\phi)^r / (4\phi(\phi-1)) \rfloor} \delta_r / \sigma_{upper}\}$  is independent of events  $\{\mathcal{Q}'_1, \dots, \mathcal{Q}'_{r-1}\}$ . Then, applying Lemma 3 to Equation (4), we have,

$$\begin{aligned} (4) &\geq \prod_{r=1}^{\log_2 \hat{k}} \left( 1 - \exp \left( -r \left\lfloor \frac{\eta'_1}{4\phi(\phi-1)} \left( \frac{2(\phi-1)}{\phi} \right)^r \right\rfloor \frac{\delta_r^2}{2\sigma_{upper}^2} \right) \right) \\ &= \prod_{r=1}^{\log_2 \hat{k}} \left( 1 - \exp \left( -r \left\lfloor \frac{\eta'_1}{4\phi(\phi-1)} \left( \frac{2(\phi-1)}{\phi} \right)^r \right\rfloor \frac{\left( \frac{\sqrt{2(\phi-1)-\sqrt{\phi}}}{\sqrt{\phi}} \right)^2 \left( \frac{\phi}{2(\phi-1)} \right)^r \delta^2}{2\sigma_{upper}^2} \right) \right) \\ &\geq \prod_{r=1}^{\log_2 \hat{k}} \left( 1 - \exp \left( -r \frac{\eta'_1}{8\phi(\phi-1)} \left( \frac{2(\phi-1)}{\phi} \right)^r \frac{\left( \frac{\sqrt{2(\phi-1)-\sqrt{\phi}}}{\sqrt{\phi}} \right)^2 \left( \frac{\phi}{2(\phi-1)} \right)^r \delta^2}{2\sigma_{upper}^2} \right) \right) \end{aligned}$$

$$= \prod_{r=1}^{\log_2 \hat{k}} \left( 1 - \exp \left( -r \frac{\eta'_1 \delta^2}{8\sigma_{upper}^2} \left( \frac{1}{\phi} - \frac{1}{\sqrt{2\phi(\phi-1)}} \right)^2 \right) \right), \quad (5)$$

where the second inequality holds because if  $a \geq 1$ , then  $\lfloor a \rfloor \geq a/2$ . Applying Lemma 2 to Equation (5), it yields,

$$(5) \geq \exp \left( -\frac{8\pi^2 \sigma_{upper}^2 \phi^3 (\phi-1)}{3\eta'_1 \delta^2 (\sqrt{2\phi(\phi-1)} - \phi)^2} \right).$$

Therefore, if  $N/k \geq \eta'_1$ , the PGS of the  $\mathcal{FBKT}$  procedure is lower bounded by  $\exp(-4\pi^2 \sigma_{upper}^2 / (3\eta'_1 \delta^2 (1/\phi - 1/\sqrt{2\phi(\phi-1)}))^2)$ . It concludes the proof.  $\square$

## Appendix C: Proof of Theorems

### C.1. Proof of Theorem 3

Let  $R = \lceil \log_2 k/m \rceil$ . We first show that if  $\phi \geq 2$  and  $N'_r = \lfloor \frac{r}{\phi(\phi-1)} \left( \frac{\phi-1}{\phi} \right)^r \frac{N}{m} \rfloor$  for  $r = 1, 2, \dots, R$  and  $N'_r = \lfloor \frac{r}{\phi-1} \left( \frac{\phi-1}{\phi} \right)^r \frac{N}{m} \rfloor$  for  $r = R+1$ , the  $\mathcal{FBKT}^{S+}$  procedure can stop before  $N_0 + N$  observations are used. It can be checked that

$$\begin{aligned} \sum_{r=1}^{R+1} N'_r &\leq \sum_{r=1}^R \frac{r}{\phi(\phi-1)} \left( \frac{\phi-1}{\phi} \right)^r \frac{N}{m} + \frac{R+1}{\phi-1} \left( \frac{\phi-1}{\phi} \right)^{R+1} \frac{N}{m} \\ &= \sum_{r=1}^{\infty} \frac{r}{\phi(\phi-1)} \left( \frac{\phi-1}{\phi} \right)^r \frac{N}{m} + \frac{R+1}{\phi-1} \left( \frac{\phi-1}{\phi} \right)^{R+1} \frac{N}{m} - \sum_{r=R+1}^{\infty} \frac{r}{\phi(\phi-1)} \left( \frac{\phi-1}{\phi} \right)^r \frac{N}{m}. \end{aligned} \quad (6)$$

For the first term in Equation (6), we have,

$$\begin{aligned} \sum_{r=1}^{\infty} \frac{r}{\phi(\phi-1)} \left( \frac{\phi-1}{\phi} \right)^r \frac{N}{m} &= \phi \left[ \sum_{r=1}^{\infty} \frac{r}{\phi(\phi-1)} \left( \frac{\phi-1}{\phi} \right)^r \frac{N}{m} - \sum_{r=1}^{\infty} \frac{r}{\phi(\phi-1)} \left( \frac{\phi-1}{\phi} \right)^{r+1} \frac{N}{m} \right] \\ &= \phi \left[ \frac{N}{\phi(\phi-1)m} \sum_{r=1}^{\infty} \left( \frac{\phi-1}{\phi} \right)^r \right] \\ &= \frac{N}{m}. \end{aligned} \quad (7)$$

For the third term in Equation (6), we have,

$$\begin{aligned} \sum_{r=R+1}^{\infty} \frac{r}{\phi(\phi-1)} \left( \frac{\phi-1}{\phi} \right)^r \frac{N}{m} &= \sum_{r=1}^{\infty} \frac{r+R}{\phi(\phi-1)} \left( \frac{\phi-1}{\phi} \right)^{r+R} \frac{N}{m} \\ &= \frac{N}{\phi(\phi-1)m} \left( \frac{\phi-1}{\phi} \right)^R \left[ \sum_{r=1}^{\infty} r \left( \frac{\phi-1}{\phi} \right)^r + R \sum_{r=1}^{\infty} \left( \frac{\phi-1}{\phi} \right)^r \right] \\ &= \frac{N}{\phi(\phi-1)m} \left( \frac{\phi-1}{\phi} \right)^R [\phi(\phi-1) + R(\phi-1)] \\ &= \frac{N}{m} \left( \frac{\phi-1}{\phi} \right)^R + \frac{NR}{\phi m} \left( \frac{\phi-1}{\phi} \right)^R. \end{aligned} \quad (8)$$

Plugging the results in Equations (7) and (8) into Equation (6) yields,

$$\begin{aligned}
\sum_{r=1}^{R+1} N'_r &\leq \sum_{r=1}^{\infty} \frac{r}{\phi(\phi-1)} \left(\frac{\phi-1}{\phi}\right)^r \frac{N}{m} + \frac{R+1}{\phi-1} \left(\frac{\phi-1}{\phi}\right)^{R+1} \frac{N}{m} - \sum_{r=R+1}^{\infty} \frac{r}{\phi(\phi-1)} \left(\frac{\phi-1}{\phi}\right)^r \frac{N}{m} \\
&= \frac{N}{m} + \frac{(R+1)N}{\phi m} \left(\frac{\phi-1}{\phi}\right)^R - \frac{N}{m} \left(\frac{\phi-1}{\phi}\right)^R - \frac{NR}{\phi m} \left(\frac{\phi-1}{\phi}\right)^R \\
&= \frac{N}{m} - \frac{N}{m} \left(\frac{\phi-1}{\phi}\right)^{R+1} \\
&\leq \frac{N}{m}.
\end{aligned} \tag{9}$$

The results stated in Equation (9) suggests that if the sample allocation rule listed in Theorem 3 is used, processor  $s$  for  $s = 1, 2, \dots, m$  simulates fewer than  $|\mathcal{I}_1^s| n_0 + N/m$  observations during the entire selection process. Notice that sets  $\mathcal{I}_1^1, \mathcal{I}_1^2, \dots, \mathcal{I}_1^m$  are mutually exclusive and  $\cup_{s=1}^m \mathcal{I}_1^s = \mathcal{K}$ . It implies that the total number of observations simulated by all processors is upper bounded by  $\sum_{s=1}^m |\mathcal{I}_1^s| n_0 + N/m \leq N_0 + N$ . Therefore, we can conclude that the  $\mathcal{FBKT}^{\mathcal{S}^+}$  procedure stops before all  $N_0 + N$  observations are used. Then, we prove the first part of Theorem 3.

**Proof of Part (1)** Given that Assumptions 2 and 3 hold, we aim to show that for any positive constant  $\eta_2 \geq 2\phi^2$ , if  $\phi \geq 2$  and  $N/k \geq \eta_2$ , the PCS of the  $\mathcal{FBKT}^{\mathcal{S}^+}$  procedure can be lower bounded. To prove this, we first let  $\hat{k}' = 2^R$ . Notice that the  $\mathcal{FBKT}^{\mathcal{S}^+}$  procedure equally allocates  $k$  alternatives to  $m$  processors. Each processor handles the selection of at most  $\lceil k/m \rceil$  alternatives, and can identify the local best alternative in  $R$  rounds. For  $1 \leq r \leq R$  and  $s = 1, 2, \dots, m$ , at the beginning of round  $r$  in processor  $s$ , there are at most  $\hat{k}'/2^{r-1}$  alternatives that are still in contention, i.e.,  $|\mathcal{I}_r^s| \leq \hat{k}'/2^{r-1}$ . Let  $s_k$  denote the processor where alternative  $k$  is assigned and  $k_r$  denote the alternative that competes with alternative  $k$  in round  $r$  in processor  $s_k$ . For  $1 \leq r \leq R$ , we define  $\mathcal{E}_r$  as the event that alternative  $k$  eliminates alternative  $k_r$  in round  $r$  in processor  $s_k$ , i.e.,  $\mathcal{E}_r = \{\bar{X}_k^r \geq \bar{X}_{k_r}^r\}$ . For  $r = R+1$ , we define  $\mathcal{E}_r$  as the event that alternative  $k$  eliminates all other alternatives in  $\mathcal{I}_{final}$ , i.e.,  $\{\bar{X}_k^{R+1} \geq \max_{i \in \mathcal{I}_{final} \setminus \{k\}} \bar{X}_i^{R+1}\}$ . For  $1 \leq r \leq R+1$ , we let  $\mathcal{E}_r^c$  be the complement of event  $\mathcal{E}_r$ . Then, we can write the PCS of the  $\mathcal{FBKT}^{\mathcal{S}^+}$  procedure as follows,

$$\text{PCS} = \mathbb{P} \left( \bigcap_{r=1}^{R+1} \mathcal{E}_r \right) = \mathbb{P}(\mathcal{E}_1) \prod_{r=2}^R \mathbb{P}(\mathcal{E}_r | \mathcal{E}_1, \dots, \mathcal{E}_{r-1}) \mathbb{P}(\mathcal{E}_{R+1} | \mathcal{E}_1, \dots, \mathcal{E}_R). \tag{10}$$

For  $1 \leq r \leq R$ , we establish a lower bound for the sampling budget that should be allocated each alternative in round  $r$  in processor  $s_k$  as follows,

$$\begin{aligned}
\mathcal{N}_r^{s_k} &= \left\lfloor \frac{N'_r}{|\mathcal{I}_r^{s_k}|} \right\rfloor \\
&= \left\lfloor \frac{r}{\phi(\phi-1)} \left(\frac{\phi-1}{\phi}\right)^r \frac{N}{m |\mathcal{I}_r^{s_k}|} \right\rfloor
\end{aligned}$$

$$\begin{aligned}
&\geq \left\lfloor \frac{r}{\phi(\phi-1)} \left( \frac{\phi-1}{\phi} \right)^r \frac{\eta_2 k}{m_{\frac{\hat{k}'}{2^{r-1}}}} \right\rfloor \\
&= \left\lfloor \frac{r}{\phi(\phi-1)} \left( \frac{2(\phi-1)}{\phi} \right)^r \frac{\eta_2 k}{2m\hat{k}'} \right\rfloor \\
&\geq r \left\lfloor \frac{\eta_2}{4\phi(\phi-1)} \left( \frac{2(\phi-1)}{\phi} \right)^r \right\rfloor, \tag{11}
\end{aligned}$$

where the first inequality holds because  $N \geq \eta_2 k$  and  $|\mathcal{I}_r^{s_k}| \leq \hat{k}'/2^{r-1}$  for  $1 \leq r \leq R$ . The second inequality holds because by the definition of  $\hat{k}'$ ,  $\hat{k}' < 2k/m$ . Notice that  $\eta_2 \geq 2\phi^2$  ensures that  $\mathcal{N}_r^{s_k}$  is a positive integer no less than  $r$ . Then, based on the results listed in Equation (11), we can write the first two terms in Equation (10) as follows,

$$\begin{aligned}
&\mathbb{P}(\mathcal{E}_1) \prod_{r=2}^R \mathbb{P}(\mathcal{E}_r | \mathcal{E}_1, \dots, \mathcal{E}_{r-1}) \\
&= (1 - \mathbb{P}(\mathcal{E}_1^c)) \prod_{r=2}^R (1 - \mathbb{P}(\mathcal{E}_r^c | \mathcal{E}_1, \dots, \mathcal{E}_{r-1})) \\
&= (1 - \mathbb{P}(\bar{X}_{k_1}^1 > \bar{X}_k^1)) \prod_{r=2}^R (1 - \mathbb{P}(\bar{X}_{k_r}^r > \bar{X}_k^r | \mathcal{E}_1, \dots, \mathcal{E}_{r-1})) \\
&= \left( 1 - \mathbb{P} \left( \frac{\bar{X}_{k_1}^1 - \bar{X}_k^1 - \mu_{k_1} + \mu_k}{\frac{\sigma_{kk_1}}{\sqrt{\mathcal{N}_1^{s_k}}}} > \sqrt{\mathcal{N}_1^{s_k}} \frac{\mu_k - \mu_{k_1}}{\sigma_{kk_1}} \right) \right) \times \\
&\quad \prod_{r=2}^R \left( 1 - \mathbb{P} \left( \frac{\bar{X}_{k_r}^r - \bar{X}_k^r - \mu_{k_r} + \mu_k}{\frac{\sigma_{kk_r}}{\sqrt{\mathcal{N}_r^{s_k}}}} > \sqrt{\mathcal{N}_r^{s_k}} \frac{\mu_k - \mu_{k_r}}{\sigma_{kk_r}} \mid \mathcal{E}_1, \dots, \mathcal{E}_{r-1} \right) \right) \\
&\geq \left( 1 - \mathbb{P} \left( Z > \sqrt{\left\lfloor \frac{\eta_2}{2\phi^2} \right\rfloor} \frac{\delta}{\sigma_{upper}} \right) \right) \prod_{r=2}^R \left( 1 - \mathbb{P} \left( Z > \sqrt{r \left\lfloor \frac{\eta_2}{4\phi(\phi-1)} \left( \frac{2(\phi-1)}{\phi} \right)^r \right\rfloor} \frac{\delta}{\sigma_{upper}} \mid \mathcal{E}_1, \dots, \mathcal{E}_{r-1} \right) \right) \\
&\geq \left( 1 - \mathbb{P} \left( Z > \sqrt{\left\lfloor \frac{\eta_2}{2\phi^2} \right\rfloor} \frac{\delta}{\sigma_{upper}} \right) \right) \prod_{r=2}^R \left( 1 - \mathbb{P} \left( Z > \sqrt{r \left\lfloor \frac{\eta_2}{2\phi^2} \right\rfloor} \frac{\delta}{\sigma_{upper}} \mid \mathcal{E}_1, \dots, \mathcal{E}_{r-1} \right) \right), \tag{12}
\end{aligned}$$

where the first inequality holds due to Equation (11) and Assumptions 2 and 3. The second inequality holds due to the fact that  $[2(\phi-1)/\phi]^r \geq 2(\phi-1)/\phi$  when  $r \geq 2$  and  $\phi \geq 2$ . Because event  $\left\{ Z > \sqrt{r \lfloor \eta_2 / (2\phi^2) \rfloor} \delta / \sigma_{upper} \right\}$  is independent of events  $\{\mathcal{E}_1, \dots, \mathcal{E}_{r-1}\}$ , Equation (12) yields

$$\begin{aligned}
(12) &= \prod_{r=1}^R \left( 1 - \mathbb{P} \left( Z > \sqrt{r \left\lfloor \frac{\eta_2}{2\phi^2} \right\rfloor} \frac{\delta}{\sigma_{upper}} \right) \right) \\
&\geq \prod_{r=1}^{\infty} \left( 1 - \exp \left( - \frac{\lfloor \eta_2 / (2\phi^2) \rfloor \delta^2}{2\sigma_{upper}^2} r \right) \right) \\
&\geq \exp \left( - \frac{\pi^2 \sigma_{upper}^2}{3 \lfloor \eta_2 / (2\phi^2) \rfloor \delta^2} \right) \\
&\geq \exp \left( - \frac{4\phi^2 \pi^2 \sigma_{upper}^2}{3\eta_2 \delta^2} \right), \tag{13}
\end{aligned}$$

where the first inequality holds due to Lemma 1, and the second last inequality holds due to Lemma 2.

For processor  $s = 1, 2, \dots, m$ ,  $N'_{R+1} = \left\lfloor \frac{R+1}{\phi-1} \left( \frac{\phi-1}{\phi} \right)^{R+1} \frac{N}{m} \right\rfloor$  observations are generated for the local best alternative in round  $R+1$ . Let  $\bar{X}_i^{R+1}$  be the sample mean of alternative  $i \in \mathcal{I}_{final}$ , calculated based on these  $N'_{R+1}$  observations. Then, we can write the third term in Equation (10) as follow,

$$\begin{aligned}
\mathbb{P}(\mathcal{E}_{R+1} | \mathcal{E}_1, \dots, \mathcal{E}_R) &= \mathbb{P} \left( \bar{X}_k^{R+1} > \max_{i \in \mathcal{I}_{final} \setminus \{k\}} \bar{X}_i^{R+1} \middle| \mathcal{E}_1, \dots, \mathcal{E}_R \right) \\
&\geq 1 - \mathbb{P} \left( \bigcup_{i \in \mathcal{I}_{final} \setminus \{k\}} \{ \bar{X}_k^{R+1} < \bar{X}_i^{R+1} \} \middle| \mathcal{E}_1, \dots, \mathcal{E}_R \right) \\
&= 1 - \mathbb{P} \left( \bigcup_{i \in \mathcal{I}_{final} \setminus \{k\}} \left\{ \frac{\bar{X}_k^{R+1} - \bar{X}_i^{R+1} - \mu_k + \mu_i}{\sigma_{ki} / \sqrt{N'_{R+1}}} < \sqrt{N'_{R+1}} \frac{-\mu_k + \mu_i}{\sigma_{ki}} \right\} \middle| \mathcal{E}_1, \dots, \mathcal{E}_R \right) \\
&\geq 1 - \mathbb{P} \left( \bigcup_{i \in \mathcal{I}_{final} \setminus \{k\}} \left\{ \frac{\bar{X}_k^{R+1} - \bar{X}_i^{R+1} - \mu_k + \mu_i}{\sigma_{ki} / \sqrt{N'_{R+1}}} < \sqrt{N'_{R+1}} \frac{-\mu_k + \mu_i}{\sigma_{ki}} \right\} \middle| \mathcal{E}_1, \dots, \mathcal{E}_R \right) \\
&\geq 1 - \mathbb{P} \left( \bigcup_{i \in \mathcal{I}_{final} \setminus \{k\}} \left\{ \frac{\bar{X}_k^{R+1} - \bar{X}_i^{R+1} - \mu_k + \mu_i}{\sigma_{ki} / \sqrt{N'_{R+1}}} < \sqrt{N'_{R+1}} \frac{-\delta}{\sigma_{upper}} \right\} \middle| \mathcal{E}_1, \dots, \mathcal{E}_R \right) \\
&\geq 1 - (m-1) \mathbb{P} \left( Z < \sqrt{N'_{R+1}} \frac{-\delta}{\sigma_{upper}} \middle| \mathcal{E}_1, \dots, \mathcal{E}_R \right) \\
&= 1 - (m-1) \mathbb{P} \left( Z < \sqrt{N'_{R+1}} \frac{-\delta}{\sigma_{upper}} \right) \\
&\geq 1 - (m-1) \exp \left( -\frac{N'_{R+1} \delta^2}{2\sigma_{upper}^2} \right), \tag{14}
\end{aligned}$$

where the last equality holds because event  $\{Z < -\delta \sqrt{N'_{R+1}} / \sigma_{upper}\}$  is independent of events  $\{\mathcal{E}_1, \dots, \mathcal{E}_R\}$  and the last inequality holds due to Lemma 3. For  $N'_{R+1}$ , we have,

$$\begin{aligned}
N'_{R+1} &= \left\lfloor \frac{R+1}{\phi-1} \left( \frac{\phi-1}{\phi} \right)^{R+1} \frac{N}{m} \right\rfloor \\
&\geq \left\lfloor \frac{(\log_2 \frac{k}{m} + 1) \eta_2 k}{m(\phi-1)} \left( \frac{\phi-1}{\phi} \right)^{\log_2 k/m+2} \right\rfloor \\
&= \left\lfloor \frac{(\log_2 \frac{k}{m} + 1) \eta_2 k}{m(\phi-1)} \left( \frac{2(\phi-1)}{\phi} \right)^{\log_2 k/m+2} \frac{m}{4k} \right\rfloor \\
&\geq \frac{(\log_2 \frac{k}{m} + 1) \eta_2}{8(\phi-1)} \left( \frac{2(\phi-1)}{\phi} \right)^{\log_2 k/m+2}. \tag{15}
\end{aligned}$$

Plugging the results in Equation (15) into Equation (14) yields,

$$\begin{aligned}
\mathbb{P}(\mathcal{E}_{R+1} | \mathcal{E}_1, \dots, \mathcal{E}_R) &\geq 1 - (m-1) \exp \left( -\frac{N'_{R+1} \delta^2}{2\sigma_{upper}^2} \right) \\
&\geq 1 - (m-1) \exp \left( -\frac{(\log_2 \frac{k}{m} + 1) \eta_2 \delta^2}{8\sigma_{upper}^2 \phi} \left( \frac{2(\phi-1)}{\phi} \right)^{\log_2 k/m+1} \right). \tag{16}
\end{aligned}$$

Therefore, with the results listed in Equations (13) and (16), we can rewrite Equation (10) as,

$$\begin{aligned} \text{PCS} &= \mathbb{P}(\mathcal{E}_1) \prod_{r=2}^R \mathbb{P}(\mathcal{E}_r | \mathcal{E}_1, \dots, \mathcal{E}_{r-1}) \mathbb{P}(\mathcal{E}_{R+1} | \mathcal{E}_1, \dots, \mathcal{E}_R) \\ &\geq \exp\left(-\frac{4\phi^2\pi^2\sigma_{upper}^2}{3\eta_2\delta^2}\right) \left(1 - (m-1) \exp\left(-\frac{(\log_2 \frac{k}{m} + 1)\eta_2\delta^2}{8\sigma_{upper}^2\phi} \left(\frac{2(\phi-1)}{\phi}\right)^{\log_2 k/m+1}\right)\right). \end{aligned}$$

It concludes the proof of part (1).

**Proof of Part (2)** Given that Assumptions 3 holds, we aim to show that for any positive constant  $\eta'_2 \geq 2\phi^2$  and IZ parameter  $\delta$ , if  $\phi \geq 3$  and  $N/k \geq \eta'_2$ , the PGS of the  $\mathcal{FBKT}^{\mathcal{S}^+}$  procedure can be lower bounded. To prove this, we first let  $\hat{k}' = 2^R$ , and

$$\delta_r = \frac{\sqrt{2(\phi-1)} - \sqrt{\phi}}{\sqrt{\phi}} \left(\frac{\phi}{2(\phi-1)}\right)^{\frac{r}{2}} \delta,$$

for  $r \geq 1$ . Because  $\phi \geq 3$ ,  $\delta_r > 0$  for  $r \geq 1$  and  $\sum_{r=1}^{\infty} \delta_r = \delta$ . Notice that, each processor can identify the local best alternative in  $R$  rounds and the procedure selects the final output in round  $R+1$ . For  $1 \leq r \leq R$ , we let  $\rho_r = \arg \max_{i \in \cup_{s=1}^m \mathcal{I}_s^r} \mu_i$ , and define  $\mathfrak{s}_r$  as the processor that contains alternative  $\rho_r$ . For  $r = R+1$ , we let  $\rho_r = \arg \max_{i \in \mathcal{I}_{final}} \mu_i$ . To ease the notation, we let  $\rho_r = \varphi$  for  $r = R+2$ , where  $\varphi$  is the index of the alternative which is finally selected by the procedure. For  $1 \leq r \leq R$ , we further define event  $\mathcal{E}'_r = \{\mu_{\rho_r} - \mu_{\rho'_r} \leq \delta_r\} \cup \{\mu_{\rho_r} - \mu_{\rho'_r} > \delta_r \text{ and } \bar{X}_{\rho_r}^r \geq \bar{X}_{\rho'_r}^r\}$ , where  $\rho'_r$  is the index of the alternative that competes with alternative  $\rho_r$  in processor  $\mathfrak{s}_r$ . For  $r = R+1$ , we define event  $\mathcal{E}'_r = \cap_{i \in \mathcal{I}_{final} \setminus \{\rho_r\}} \{\{\mu_{\rho_r} - \mu_i \leq \delta_r\} \cup \{\mu_{\rho_r} - \mu_i > \delta_r \text{ and } \bar{X}_{\rho_r}^r \geq \bar{X}_i^r\}\}$ . By letting  $\mathcal{E}'_r^c$  be the complement of event  $\mathcal{E}'_r$  for  $1 \leq r \leq R+1$ , we can bound the PGS of the  $\mathcal{FBKT}^{\mathcal{S}^+}$  procedure as follows,

$$\text{PGS} \geq \mathbb{P}\left(\bigcap_{r=1}^{R+1} \{\mu_{\rho_r} - \mu_{\rho_{r+1}} \leq \delta_r\}\right) \geq \mathbb{P}\left(\bigcap_{r=1}^{R+1} \{\mathcal{E}'_r\}\right) = \mathbb{P}(\mathcal{E}'_1) \prod_{r=2}^R \mathbb{P}(\mathcal{E}'_r | \mathcal{E}'_1, \dots, \mathcal{E}'_{r-1}) \mathbb{P}(\mathcal{E}'_{R+1} | \mathcal{E}'_1, \dots, \mathcal{E}'_R), \quad (17)$$

where the first inequality holds because as long as the mean difference between alternatives  $\rho_r$  and  $\rho_{r+1}$  is less than  $\delta_r$  for  $1 \leq r \leq R+1$  the mean difference between alternatives  $k$  and  $\varphi$  is less than  $\sum_{r=1}^{\infty} \delta_r = \delta$ , and the second inequality holds because event  $\mathcal{E}'_r$  implies event  $\{\mu_{\rho_r} - \mu_{\rho_{r+1}} \leq \delta_r\}$  for  $1 \leq r \leq R+1$ . Notice that following the same arguments used in the analysis in Equation (11), we can conclude that

$$\mathcal{N}_r^{\mathfrak{s}_r} \geq r \left\lfloor \frac{\eta'_2}{4\phi(\phi-1)} \left(\frac{2(\phi-1)}{\phi}\right)^r \right\rfloor. \quad (18)$$

Because  $\eta'_2 \geq 2\phi^2$ ,  $\mathcal{N}_r^{\mathfrak{s}_r}$  is a positive integer no less than  $r$ . Then, based on the results stated in Equation (18), we can rewrite the first two terms in Equation (17) as follows,

$$\mathbb{P}(\mathcal{E}'_1) \prod_{r=2}^R \mathbb{P}(\mathcal{E}'_r | \mathcal{E}'_1, \dots, \mathcal{E}'_{r-1})$$

$$\begin{aligned}
&= \left(1 - \mathbb{P}\left(\mathcal{E}'_1^c\right)\right) \prod_{r=2}^R \left(1 - \mathbb{P}\left(\mathcal{E}'_r^c \mid \mathcal{E}'_1, \dots, \mathcal{E}'_{r-1}\right)\right) \\
&= \left(1 - \mathbb{P}\left(\mu_{\rho_1} - \mu_{\rho'_1} > \delta_1 \text{ and } \bar{X}_{\rho_1}^1 < \bar{X}_{\rho'_1}^1\right)\right) \times \\
&\quad \prod_{r=2}^R \left(1 - \mathbb{P}\left(\mu_{\rho_r} - \mu_{\rho'_r} > \delta_r \text{ and } \bar{X}_{\rho_r}^r < \bar{X}_{\rho'_r}^r \mid \mathcal{E}'_1, \dots, \mathcal{E}'_{r-1}\right)\right) \\
&= \left(1 - \mathbb{P}\left(\mu_{\rho_1} - \mu_{\rho'_1} > \delta_1 \text{ and } \frac{-\bar{X}_{\rho_1}^1 + \bar{X}_{\rho'_1}^1 + \mu_{\rho_1} - \mu_{\rho'_1}}{\sigma_{\rho_1\rho'_1}/\sqrt{\mathcal{N}_1^{\bar{s}_1}}} > \sqrt{\mathcal{N}_1^{\bar{s}_1}} \frac{\mu_{\rho_1} - \mu_{\rho'_1}}{\sigma_{\rho_1\rho'_1}}\right)\right) \times \\
&\quad \prod_{r=2}^R \left(1 - \mathbb{P}\left(\mu_{\rho_r} - \mu_{\rho'_r} > \delta_r \text{ and } \frac{-\bar{X}_{\rho_r}^r + \bar{X}_{\rho'_r}^r + \mu_{\rho_r} - \mu_{\rho'_r}}{\sigma_{\rho_r\rho'_r}/\sqrt{\mathcal{N}_r^{\bar{s}_r}}} > \sqrt{\mathcal{N}_r^{\bar{s}_r}} \frac{\mu_{\rho_r} - \mu_{\rho'_r}}{\sigma_{\rho_r\rho'_r}} \mid \mathcal{E}'_1, \dots, \mathcal{E}'_{r-1}\right)\right) \\
&\geq \left(1 - \mathbb{P}\left(\mu_{\rho_1} - \mu_{\rho'_1} > \delta_1 \text{ and } Z > \sqrt{\left\lfloor \frac{\eta'_2}{2\phi^2} \right\rfloor} \frac{\delta_1}{\sigma_{upper}}\right)\right) \times \\
&\quad \prod_{r=2}^R \left(1 - \mathbb{P}\left(\mu_{\rho_r} - \mu_{\rho'_r} > \delta_r \text{ and } Z > \sqrt{r \left\lfloor \frac{\eta'_2}{4\phi(\phi-1)} \left(\frac{2(\phi-1)}{\phi}\right)^r \right\rfloor} \frac{\delta_r}{\sigma_{upper}} \mid \mathcal{E}'_1, \dots, \mathcal{E}'_{r-1}\right)\right) \\
&\geq \left(1 - \mathbb{P}\left(Z > \sqrt{\left\lfloor \frac{\eta'_2}{2\phi^2} \right\rfloor} \frac{\delta_1}{\sigma_{upper}}\right)\right) \prod_{r=2}^R \left(1 - \mathbb{P}\left(Z > \sqrt{r \left\lfloor \frac{\eta'_2}{4\phi(\phi-1)} \left(\frac{2(\phi-1)}{\phi}\right)^r \right\rfloor} \frac{\delta_r}{\sigma_{upper}} \mid \mathcal{E}'_1, \dots, \mathcal{E}'_{r-1}\right)\right) \\
&= \prod_{r=1}^R \left(1 - \mathbb{P}\left(Z > \sqrt{r \left\lfloor \frac{\eta'_2}{4\phi(\phi-1)} \left(\frac{2(\phi-1)}{\phi}\right)^r \right\rfloor} \frac{\delta_r}{\sigma_{upper}} \mid \mathcal{E}'_1, \dots, \mathcal{E}'_{r-1}\right)\right), \tag{19}
\end{aligned}$$

where the last inequality holds because event  $\{Z > \sqrt{r \lfloor \eta'_2 / (4\phi(\phi-1)) (2(\phi-1)/\phi)^r \rfloor} \delta_r / \sigma_{upper}\}$  is independent of events  $\{\mathcal{E}'_1, \dots, \mathcal{E}'_{r-1}\}$ . Then, applying Lemmas 2 and 3 to Equation (19), we have,

$$\begin{aligned}
(19) &\geq \prod_{r=1}^R \left(1 - \exp\left(-r \left\lfloor \frac{\eta'_2}{4\phi(\phi-1)} \left(\frac{2(\phi-1)}{\phi}\right)^r \right\rfloor \frac{\delta_r^2}{2\sigma_{upper}^2}\right)\right) \\
&= \prod_{r=1}^{\infty} \left(1 - \exp\left(-r \left\lfloor \frac{\eta'_2}{4\phi(\phi-1)} \left(\frac{2(\phi-1)}{\phi}\right)^r \right\rfloor \frac{\left(\frac{\sqrt{2(\phi-1)} - \sqrt{\phi}}{\sqrt{\phi}}\right)^2 \left(\frac{\phi}{2(\phi-1)}\right)^r \delta^2}{2\sigma_{upper}^2}\right)\right) \\
&\geq \prod_{r=1}^{\log_2 \hat{k}} \left(1 - \exp\left(-r \frac{\eta'_2}{8\phi(\phi-1)} \left(\frac{2(\phi-1)}{\phi}\right)^r \frac{\left(\frac{\sqrt{2(\phi-1)} - \sqrt{\phi}}{\sqrt{\phi}}\right)^2 \left(\frac{\phi}{2(\phi-1)}\right)^r \delta^2}{2\sigma_{upper}^2}\right)\right) \\
&= \prod_{r=1}^{\log_2 \hat{k}} \left(1 - \exp\left(-r \frac{\eta'_2 \delta^2}{8\sigma_{upper}^2} \left(\frac{1}{\phi} - \frac{1}{\sqrt{2\phi(\phi-1)}}\right)^2\right)\right) \\
&\geq \exp\left(-\frac{8\pi^2 \sigma_{upper}^2 \phi^3 (\phi-1)}{3\eta'_2 \delta^2 \left(\sqrt{2\phi(\phi-1)} - \phi\right)^2}\right), \tag{20}
\end{aligned}$$

where the first inequality holds due to Lemma 3, the second inequality holds because if  $a \geq 1$ , then  $\lfloor a \rfloor \geq a/2$ , and the third inequality holds due to Lemma 2.

For processor  $s = 1, 2, \dots, m$ ,  $N'_{R+1} = \left\lfloor \frac{R+1}{\phi-1} \left( \frac{\phi-1}{\phi} \right)^{R+1} \frac{N}{m} \right\rfloor$  observations are generated for the local best alternative in round  $R+1$ . Let  $\bar{X}_i^{R+1}$  be the sample mean of alternative  $i \in \mathcal{I}_{final}$  calculated based on these  $N'_{R+1}$  observations. Then, by letting  $\mathcal{I}'_{final} = \mathcal{I}_{final} \setminus \{\rho_{R+1}\}$ , we can write the third term in Equation (17) as,

$$\begin{aligned}
& \mathbb{P}(\mathcal{E}'_{R+1} | \mathcal{E}'_1, \dots, \mathcal{E}'_R) \\
&= \mathbb{P} \left( \bigcap_{i \in \mathcal{I}'_{final}} \left\{ \{\mu_{\rho_{R+1}} - \mu_i \leq \delta_{R+1}\} \cup \{\mu_{\rho_{R+1}} - \mu_i > \delta_{R+1} \text{ and } \bar{X}_{\rho_{R+1}}^{R+1} \geq \bar{X}_i^{R+1}\} \right\} \middle| \mathcal{E}'_1, \dots, \mathcal{E}'_R \right) \\
&= 1 - \mathbb{P} \left( \bigcup_{i \in \mathcal{I}'_{final}} \left\{ \mu_{\rho_{R+1}} - \mu_i > \delta_{R+1} \text{ and } \bar{X}_{\rho_{R+1}}^{R+1} < \bar{X}_i^{R+1} \right\} \middle| \mathcal{E}'_1, \dots, \mathcal{E}'_R \right) \\
&= 1 - \mathbb{P} \left( \bigcup_{i \in \mathcal{I}'_{final}} \left\{ \mu_{\rho_{R+1}} - \mu_i > \delta_{R+1} \text{ and } \frac{-\bar{X}_{\rho_{R+1}}^{R+1} + \bar{X}_i^{R+1} + \mu_{\rho_{R+1}} - \mu_i}{\sigma_{\rho_{R+1}i} / \sqrt{N'_{R+1}}} > \sqrt{N'_{R+1}} \frac{\mu_{\rho_{R+1}} - \mu_i}{\sigma_{\rho_{R+1}i}} \right\} \middle| \mathcal{E}'_1, \dots, \mathcal{E}'_R \right) \\
&\geq 1 - \mathbb{P} \left( \bigcup_{i \in \mathcal{I}'_{final}} \left\{ \mu_{\rho_{R+1}} - \mu_i > \delta_{R+1} \text{ and } \frac{-\bar{X}_{\rho_{R+1}}^{R+1} + \bar{X}_i^{R+1} + \mu_{\rho_{R+1}} - \mu_i}{\sigma_{\rho_{R+1}i} / \sqrt{N'_{R+1}}} > \sqrt{N'_{R+1}} \frac{\delta_{R+1}}{\sigma_{upper}} \right\} \middle| \mathcal{E}'_1, \dots, \mathcal{E}'_R \right) \\
&\geq 1 - \mathbb{P} \left( \bigcup_{i \in \mathcal{I}'_{final}} \left\{ \frac{-\bar{X}_{\rho_{R+1}}^{R+1} + \bar{X}_i^{R+1} + \mu_{\rho_{R+1}} - \mu_i}{\sigma_{\rho_{R+1}i} / \sqrt{N'_{R+1}}} > \sqrt{N'_{R+1}} \frac{\delta_{R+1}}{\sigma_{upper}} \right\} \middle| \mathcal{E}'_1, \dots, \mathcal{E}'_R \right) \\
&\geq 1 - (m-1) \mathbb{P} \left( Z > \sqrt{N'_{R+1}} \frac{\delta_{R+1}}{\sigma_{upper}} \middle| \mathcal{E}'_1, \dots, \mathcal{E}'_R \right) \\
&= 1 - (m-1) \mathbb{P} \left( Z > \sqrt{N'_{R+1}} \frac{\delta_{R+1}}{\sigma_{upper}} \right) \\
&\geq 1 - (m-1) \exp \left( -\frac{N'_{R+1} \delta_{R+1}^2}{2\sigma_{upper}^2} \right), \tag{21}
\end{aligned}$$

where the second equality holds due to De Morgan's Law, and the last inequality holds due to Lemma 3. According the results listed in Equation (15), for  $N'_{R+1}$ , we have,

$$N'_{R+1} \geq \frac{(\log_2 \frac{k}{m} + 1) \eta'_2}{8(\phi-1)} \left( \frac{2(\phi-1)}{\phi} \right)^{\log_2 k/m+2}. \tag{22}$$

Plugging the results in Equation (22) into Equation (21), we have

$$\begin{aligned}
& \mathbb{P}(\mathcal{E}'_{R+1} | \mathcal{E}'_1, \dots, \mathcal{E}'_R) \\
&\geq 1 - (m-1) \exp \left( -\frac{N'_{R+1} \delta_{R+1}^2}{2\sigma_{upper}^2} \right) \\
&\geq 1 - (m-1) \exp \left( -\frac{\frac{(\log_2 \frac{k}{m} + 1) \eta'_2}{8(\phi-1)} \left( \frac{2(\phi-1)}{\phi} \right)^{\log_2 k/m+2} \left( \frac{\sqrt{2(\phi-1)} - \sqrt{\phi}}{\sqrt{\phi}} \right)^2 \left( \frac{\phi}{2(\phi-1)} \right)^{\log_2 k/m+2} \delta^2}{2\sigma_{upper}^2} \right)
\end{aligned}$$

$$= 1 - (m - 1) \exp \left( - \frac{(\log_2 \frac{k}{m} + 1) \eta'_2 \left( 3\phi - 2 + 2\sqrt{2\phi(\phi - 1)} \right)}{16\sigma_{upper}^2 \phi(\phi - 1)} \delta^2 \right). \quad (23)$$

Therefore, with the results listed in Equations (20) and (23), we can rewrite Equation (17) as

$$\begin{aligned} \text{PGS} &\geq \mathbb{P}(\mathcal{E}'_1) \prod_{r=2}^R \mathbb{P}(\mathcal{E}'_r | \mathcal{E}'_1, \dots, \mathcal{E}'_{r-1}) \mathbb{P}(\mathcal{E}'_{R+1} | \mathcal{E}'_1, \dots, \mathcal{E}'_R) \\ &\geq \exp \left( - \frac{8\pi^2 \sigma_{upper}^2 \phi^3 (\phi - 1)}{3\eta'_2 \delta^2 (\sqrt{2\phi(\phi - 1)} - \phi)^2} \right) \left( 1 - (m - 1) \exp \left( - \frac{(\log_2 \frac{k}{m} + 1) \eta'_2 \left( 3\phi - 2 + 2\sqrt{2\phi(\phi - 1)} \right)}{16\sigma_{upper}^2 \phi(\phi - 1)} \delta^2 \right) \right). \end{aligned}$$

It concludes the proof of part (2).  $\square$
